# Supplementary material for: A pH and magnetic dual-response hydrogel for synergistic chemo-magnetic hyperthermia tumor therapy
Source: Royal Society of Chemistry journal article supplement (doi:10.1039/c8ra00215k), 2018-01-01
Supplement: c8ra00215k1.pdf [file c8ra00215k1.pdf]

***Supplementary Information for***

**A pH and Magnetic Dual-responsive Hydrogel  
for Synergistic Chemo-Magnetic  
Hyperthermia Therapy of Tumor**

*Xiaohan Zhou <sup>a,1</sup>, Longchen Wang <sup>b</sup>, Yanjun Xu <sup>b</sup>, Wenxian Du <sup>c</sup>, Xiaojun Cai <sup>b</sup>,  
Fengjuan Wang <sup>a</sup>, Yi Ling <sup>b</sup>, Hangrong Chen <sup>c</sup>, Zhigang Wang <sup>a</sup>, Bing Hu <sup>b,\*</sup>, Yuanyi  
Zheng <sup>a,b,\*</sup>*

<sup>a</sup>Chongqing Key Laboratory of Ultrasound Molecular Imaging & State Key  
Laboratory of Ultrasound Engineering in Medicine Co-Founded by Chongqing and  
the Ministry of Science and Technology, Second Affiliated Hospital of Chongqing  
Medical University, Chongqing, 400010, PR China

<sup>b</sup>Shanghai Jiao Tong University Affiliated Sixth People's Hospital, Shanghai, 200233,  
PR China

<sup>c</sup>State Key Laboratory of High Performance Ceramic and Superfine Microstructures,  
Shanghai Institute of Ceramics, Chinese Academy of Sciences, Shanghai, 200050, PR  
China

Corresponding authors: Professors Yuanyi Zheng & Bing Hu

Address: Shanghai Jiao Tong University Affiliated Sixth People's Hospital, 600  
Yishan Road, 200233, Shanghai, China

E-mail: zhengyuanyi@163.com

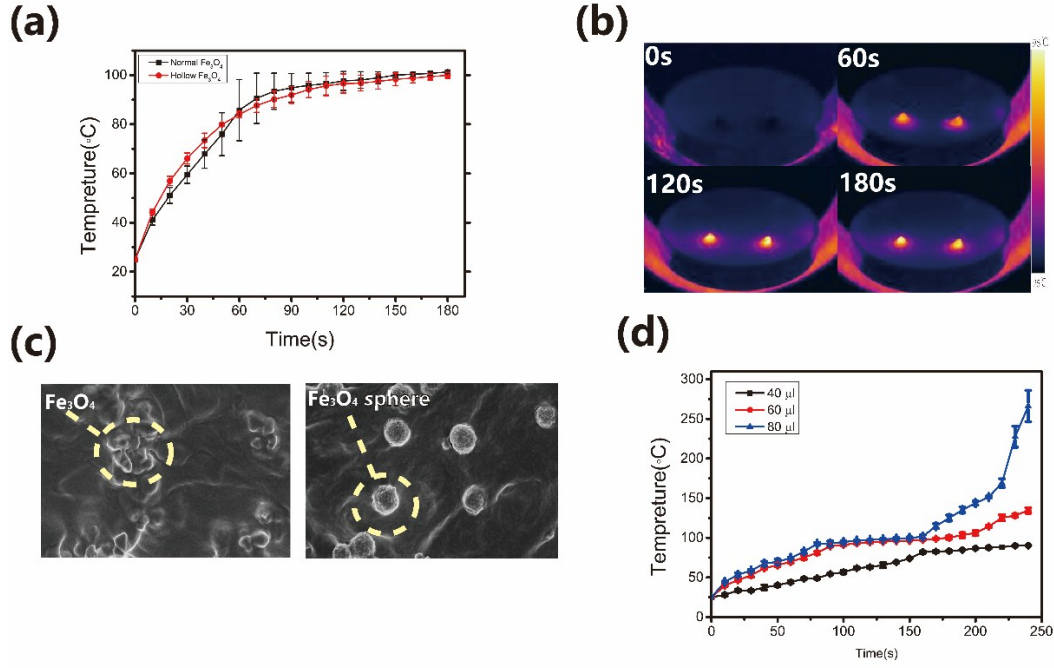

Fig S1. a) The temperature rising curve of Fe<sub>3</sub>O<sub>4</sub> spheres and Fe<sub>3</sub>O<sub>4</sub> nanoparticles in the hydrogel respectively. The final temperature of the two Fe<sub>3</sub>O<sub>4</sub> reached the same stage. b) The thermal images of Fe<sub>3</sub>O<sub>4</sub> spheres and Fe<sub>3</sub>O<sub>4</sub> nanoparticles in the hydrogel heating process in AMF respectively. The left is the Fe<sub>3</sub>O<sub>4</sub> spheres and the right is the Fe<sub>3</sub>O<sub>4</sub> nanoparticles in hydrogel. relatively c) Different distribution of normal Fe<sub>3</sub>O<sub>4</sub> and Fe<sub>3</sub>O<sub>4</sub> spheres in the HPMC/Fe<sub>3</sub>O<sub>4</sub> hydrogel showed normal Fe<sub>3</sub>O<sub>4</sub> nanoparticles gathered while Fe<sub>3</sub>O<sub>4</sub> spheres dispersed in the hydrogel. d) Different volumes (40, 60, 80 μl) of HPMC/Fe<sub>3</sub>O<sub>4</sub> hydrogel heating process and the 60 μl of HPMC/Fe<sub>3</sub>O<sub>4</sub> hydrogel could reach the high temperature and more steady than the 80 μl

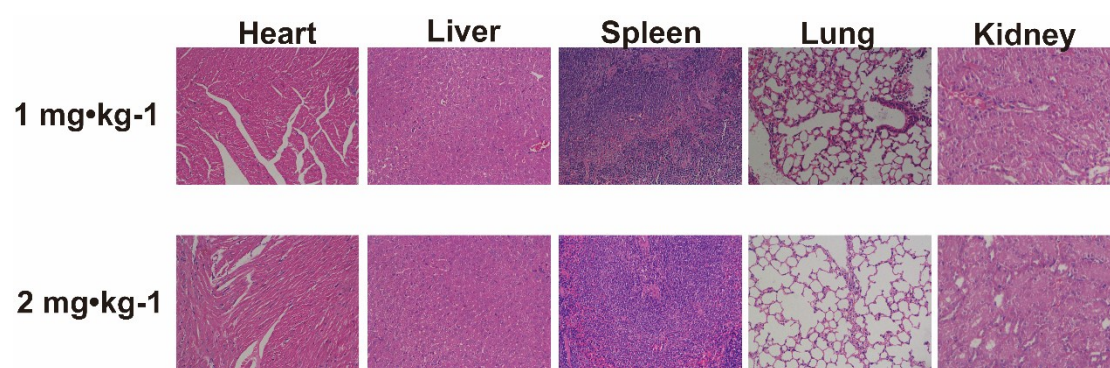

Fig S2. the H&E staining of mice at 14 days after the injection of the HPMC/Fe<sub>3</sub>O<sub>4</sub> at 0.5 mg·kg<sup>-1</sup> or 2 mg·kg<sup>-1</sup>.

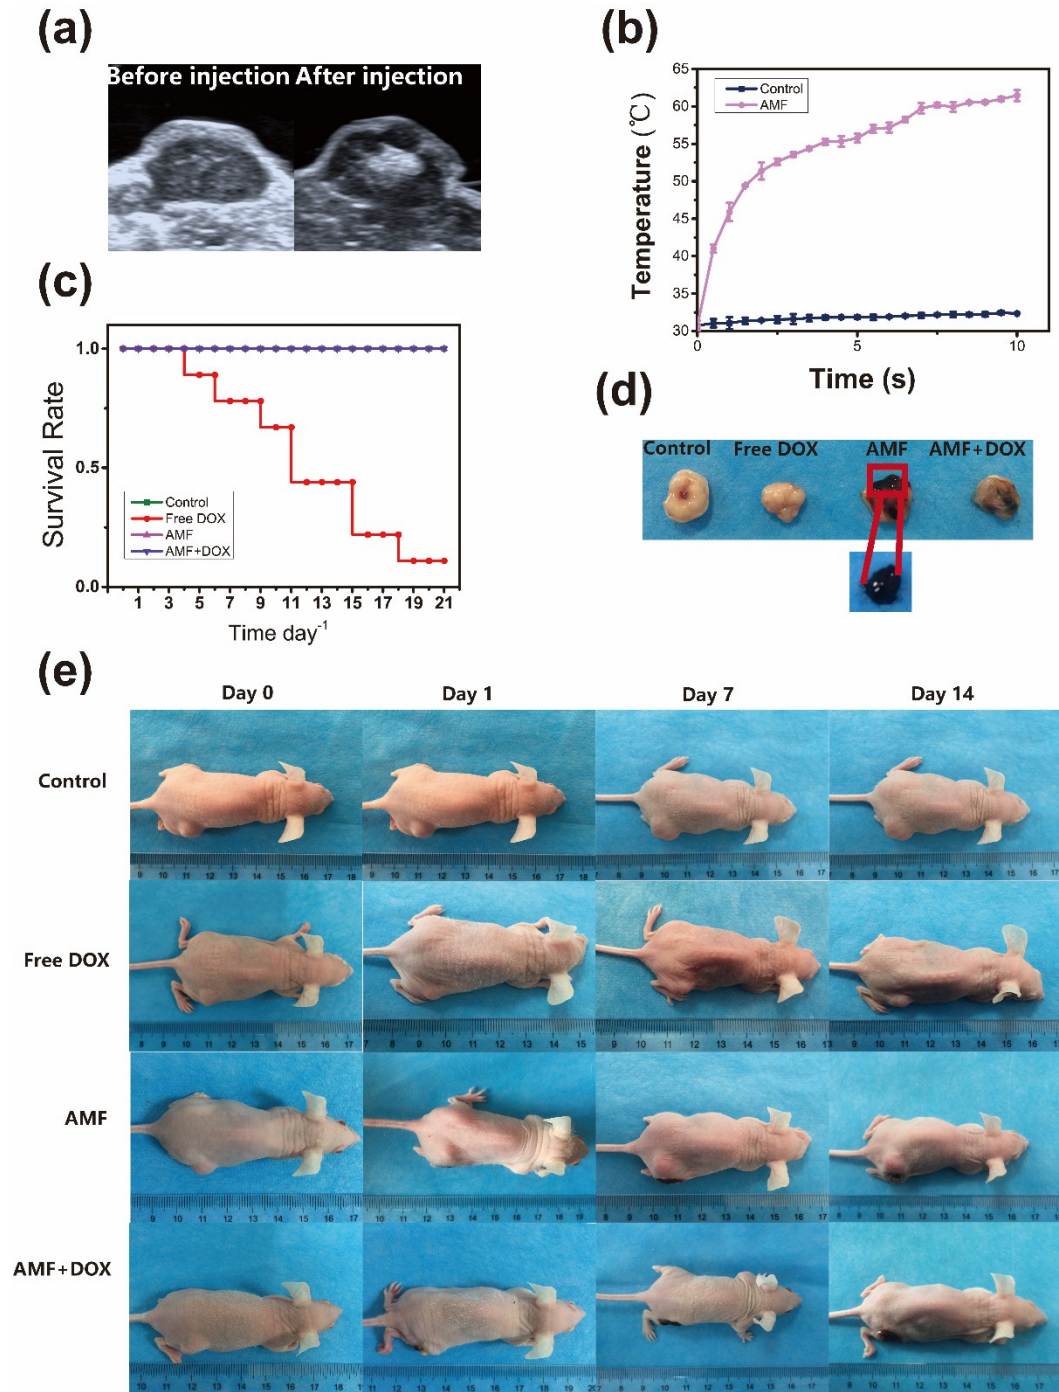

Fig S3. a) The HPMC/Fe<sub>3</sub>O<sub>4</sub> was injected into the center of the tumor under ultrasound guidance. b) Temperature curve of control group and AMF group. c) The survival ratio of each group. d) The digital images of tumor after treatment 3 days showed the tumors in each group decreased in the treatment group. And the hydrogel gelled after AMF. e) The continuous macrograph of mice in control group, free dox

group, AMF group before treatment and after treatment 7 days exhibited recurrences in AMF group and free DOX treatment failed to restrain the tumor growth.

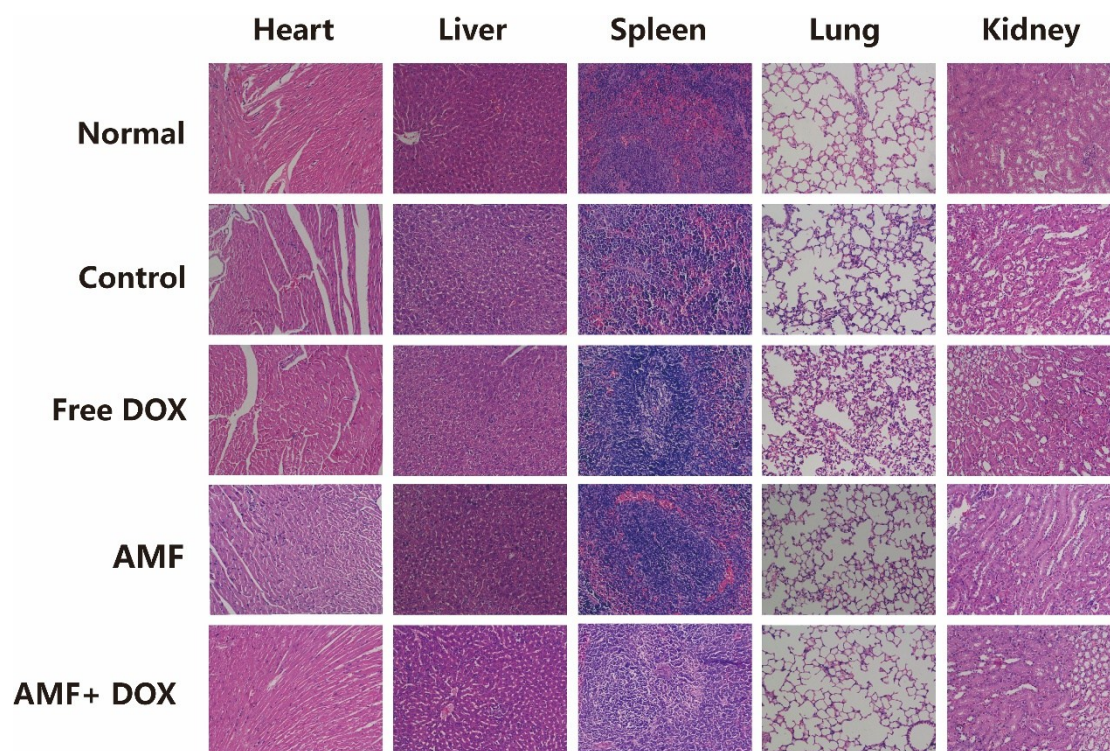

Fig S4. H&E staining images of normal nude mouse and tumor-bearing nude mouse in control group, free dox group, AMF group and AMF+DOX group showed no tumor metastasis occurred in all group.
